# Supplementary material for: Electrocatalytic activity of alkyne-functionalized AgAu alloy nanoparticles for oxygen reduction in alkaline media
Source: Royal Society of Chemistry journal article supplement (doi:10.1039/c5nr01376c), 2015-01-01
Supplement: c5nr01376c1.pdf [file c5nr01376c1.pdf]

Electronic Supplementary Information

## Electrocatalytic Activity of Alkyne-Functionalized AgAu Alloy Nanoparticles for Oxygen Reduction in Alkaline Media

Peiguang Hu, Yang Song, Limei Chen, and Shaowei Chen\*

Department of Chemistry and Biochemistry, University of California, 1156 High Street, Santa Cruz, California 95064. \* E-mail: [Shaowei@ucsc.edu](mailto:Shaowei@ucsc.edu)

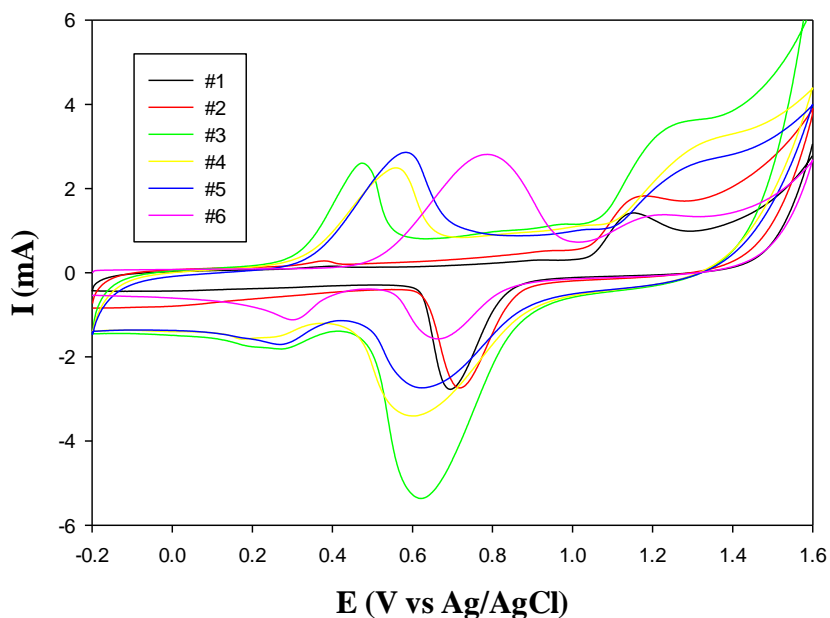

**Figure S1.** Cyclic voltammograms of glassy carbon electrodes modified with AgAu nanoparticles (same as in Figure 5) in 0.1 M NaOH. The effective electrochemical surface areas as summarized below were determined by oxygen adsorption on Ag ( $210 \mu\text{C}/\text{cm}^2$ ) and Au ( $390 \mu\text{C}/\text{cm}^2$ ), in which the Ag oxidation peaks and gold oxide reduction peaks were used to obtain the amount of charge.<sup>1,2</sup>

| Samples             | #1   | #2   | #3   | #4   | #5   | #6   |
|---------------------|------|------|------|------|------|------|
| A ( $\text{cm}^2$ ) | 6.07 | 5.56 | 2.46 | 4.44 | 4.33 | 4.04 |

- (1) Trasatti, S.; Petrii, O. A. *J Electroanal Chem* **1992**, 327, 353.
- (2) Motheo, A. J.; Machado, S. A. S.; Vankampen, M. H.; Santos, J. R. *J Brazil Chem Soc* **1993**, 4, 122.

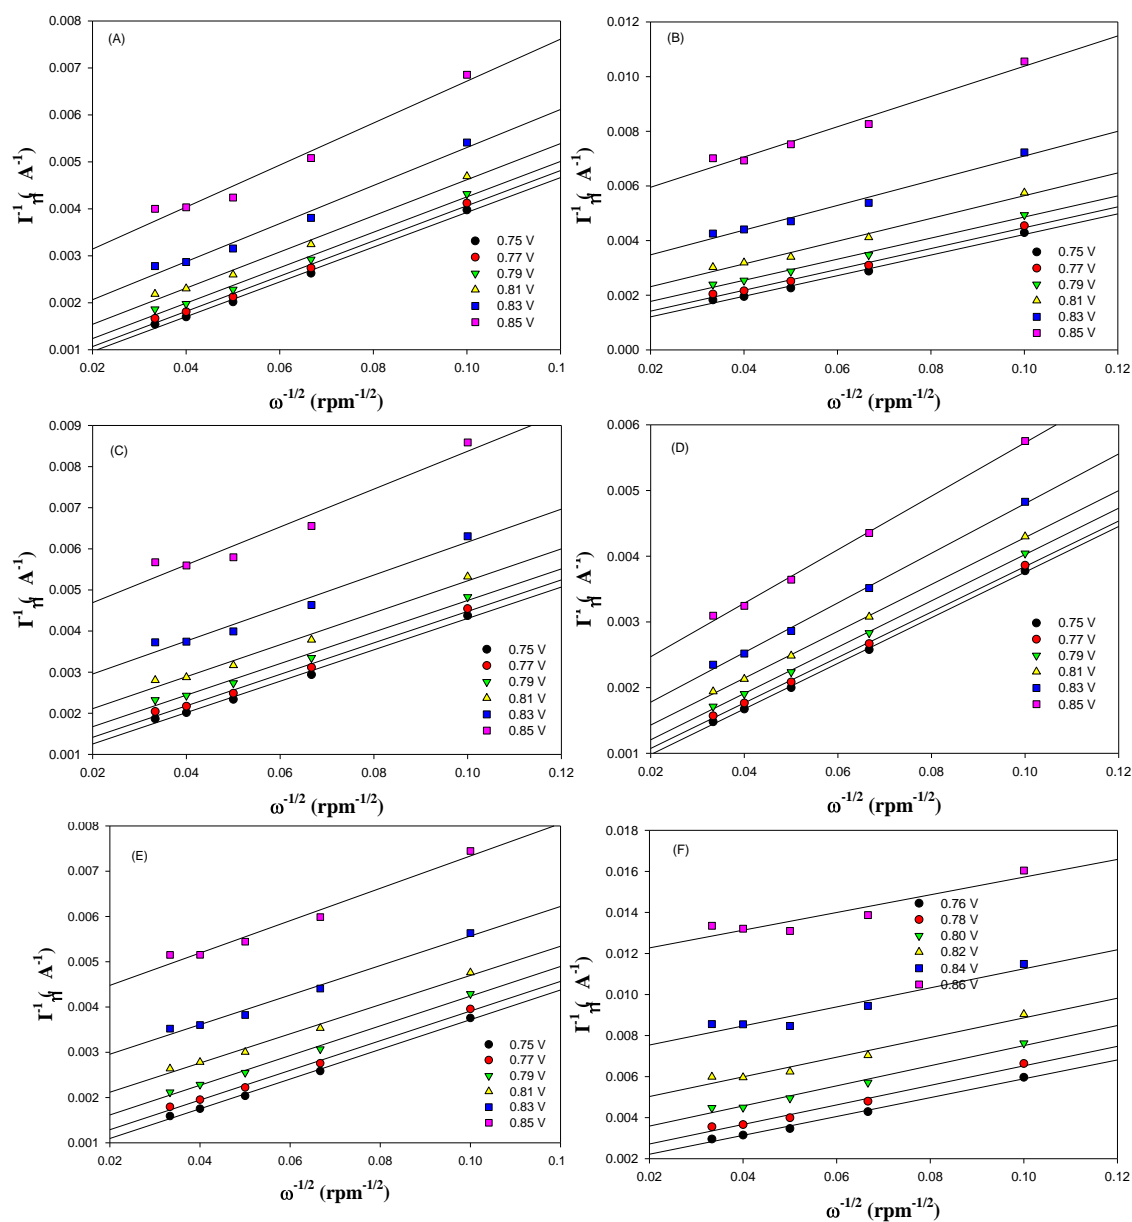

**Figure S2.** Koutecky-Levich plots of the six AgAu nanoparticles in oxygen-saturated 0.1 M KOH at varied rotation rates (specified in figure legends). Symbols are experimental data from Figure 5 and lines are linear regressions.
